# Supplementary material for: Supper Timing and Cardiovascular Mortality: The Japan Collaborative Cohort Study
Source: MDPI journal article supplement (doi:10.3390/nu13103389), 2021-09-27
Supplement: s1 [file s1]

## Supplementary Materials

**Supplementary Table S1 Hazard ratios (HRs) and 95% confidence intervals (CIs) for cardiovascular mortality outcomes according to supper time among breakfast skippers and breakfast consumers.**

|                                        | Supper time, pm |                 |                 |
|----------------------------------------|-----------------|-----------------|-----------------|
|                                        | Always<br>≤8    | Irregular       | Always >8       |
| <b>Breakfast skippers, n</b>           | 1167            | 302             | 132             |
| Person-years                           | 18963           | 4958            | 2216            |
| <b>Total stroke, n</b>                 | 29              | 4               | 2               |
| Age and sex-adjusted HR (95% CI)       | 1               | _____           | _____           |
| Multivariable HR (95% CI)*             | 1               | _____           | _____           |
| Multivariable HR (95% CI) <sup>†</sup> | 1               | _____           | _____           |
| <b>Cerebral infarction, n</b>          | 11              | 1               | 1               |
| Age and sex-adjusted HR (95% CI)       | 1               | _____           | _____           |
| Multivariable HR (95% CI)*             | 1               | _____           | _____           |
| Multivariable HR (95% CI) <sup>†</sup> | 1               | _____           | _____           |
| <b>Hemorrhagic stroke, n</b>           | 10              | 3               | 0               |
| Age and sex-adjusted HR (95% CI)       | 1               | _____           | _____           |
| Multivariable HR (95% CI)*             | 1               | _____           | _____           |
| Multivariable HR (95% CI) <sup>†</sup> | 1               | _____           | _____           |
| <b>Coronary heart disease, n</b>       | 16              | 3               | 1               |
| Age and sex-adjusted HR (95% CI)       | 1               | _____           | _____           |
| Multivariable HR (95% CI)*             | 1               | _____           | _____           |
| Multivariable HR (95% CI) <sup>†</sup> | 1               | _____           | _____           |
| <b>Total cardiovascular disease, n</b> | 60              | 12              | 4               |
| Age and sex-adjusted HR (95% CI)       | 1               | 1.26(0.67-2.36) | 0.74(0.27-2.05) |
| Multivariable HR (95% CI)*             | 1               | 1.39(0.69-2.82) | 1.16(0.40-3.35) |
| Multivariable HR (95% CI) <sup>†</sup> | 1               | 1.14(0.51-2.51) | 1.11(0.36-3.39) |
| <b>Breakfast consumers, n</b>          | 64457           | 3511            | 1608            |
| Person-years                           | 1044943         | 57491           | 26898           |
| <b>Total stroke, n</b>                 | 1900            | 65              | 21              |
| Age and sex-adjusted HR (95% CI)       | 1               | 1.27(0.99-1.62) | 0.88(0.57-1.35) |
| Multivariable HR (95% CI)*             | 1               | 1.19(0.92-1.52) | 0.82(0.53-1.26) |
| Multivariable HR (95% CI) <sup>†</sup> | 1               | 1.20(0.93-1.54) | 0.81(0.53-1.25) |
| <b>Cerebral infarction, n</b>          | 1068            | 22              | 8               |
| Age and sex-adjusted HR (95% CI)       | 1               | 0.89(0.59-1.37) | 0.69(0.35-1.38) |
| Multivariable HR (95% CI)*             | 1               | 0.82(0.54-1.26) | 0.63(0.32-1.27) |
| Multivariable HR (95% CI) <sup>†</sup> | 1               | 0.84(0.55-1.28) | 0.62(0.31-1.25) |
| <b>Hemorrhagic stroke, n</b>           | 768             | 40              | 13              |
| Age and sex-adjusted HR (95% CI)       | 1               | 1.56(1.13-2.15) | 1.09(0.63-1.90) |
| Multivariable HR (95% CI)*             | 1               | 1.47(1.06-2.03) | 1.03(0.60-1.79) |
| Multivariable HR (95% CI) <sup>†</sup> | 1               | 1.47(1.06-2.04) | 1.03(0.59-1.79) |
| <b>Coronary heart disease, n</b>       | 883             | 27              | 13              |
| Age and sex-adjusted HR (95% CI)       | 1               | 1.10(0.75-1.61) | 1.13(0.65-1.95) |
| Multivariable HR (95% CI)*             | 1               | 0.98(0.66-1.44) | 1.03(0.60-1.79) |
| Multivariable HR (95% CI) <sup>†</sup> | 1               | 0.97(0.66-1.44) | 1.03(0.59-1.78) |
| <b>Total cardiovascular disease, n</b> | 4376            | 137             | 55              |

---

|                                        |   |                 |                 |
|----------------------------------------|---|-----------------|-----------------|
| Age and sex-adjusted HR (95% CI)       | 1 | 1.17(0.98-1.38) | 1.01(0.77-1.31) |
| Multivariable HR (95% CI)*             | 1 | 1.09(0.92-1.30) | 0.94(0.72-1.23) |
| Multivariable HR (95% CI) <sup>†</sup> | 1 | 1.10(0.92-1.30) | 0.93(0.71-1.22) |

---

\* Adjusted further for histories of hypertension and diabetes, smoking status, alcohol intake, BMI, hours of walking, hours of sports, hours of sleeping, educational status, perceived mental stress, and marital status.

<sup>†</sup> Adjusted further for food and nutrients: total energy intake, food intakes of fish, fruits, vegetables, and nutrients intakes of sodium and saturated fatty acids.

**Supplementary Table S2 BMI stratified hazard ratios (HRs) and 95% confidence intervals (CIs) for cardiovascular mortality outcomes according to supper time.**

|                                        | Supper time, pm |                 |                 |
|----------------------------------------|-----------------|-----------------|-----------------|
|                                        | Always ≤8       | Irregular       | Always >8       |
| <b>BMI ≥25 kg/m<sup>2</sup>, n</b>     | 12228           | 840             | 336             |
| Person-years                           | 203325          | 13836           | 5773            |
| <b>Total stroke, n</b>                 | 324             | 9               | 2               |
| Age and sex-adjusted HR (95% CI)       | 1               | 0.78(0.40-1.52) | 0.38(0.10-1.54) |
| Multivariable HR (95% CI)*             | 1               | 0.77(0.39-1.52) | 0.39(0.10-1.57) |
| Multivariable HR (95% CI) <sup>†</sup> | 1               | 0.77(0.39-1.51) | 0.37(0.09-1.48) |
| <b>Cerebral infarction, n</b>          | 178             | 4               | 2               |
| Age and sex-adjusted HR (95% CI)       | 1               | ————            | ————            |
| Multivariable HR (95% CI)*             | 1               | ————            | ————            |
| Multivariable HR (95% CI) <sup>†</sup> | 1               | ————            | ————            |
| <b>Hemorrhagic stroke, n</b>           | 134             | 5               | 0               |
| Age and sex-adjusted HR (95% CI)       | 1               | 0.84(0.34-2.06) | ————            |
| Multivariable HR (95% CI)*             | 1               | 0.85(0.34-2.12) | ————            |
| Multivariable HR (95% CI) <sup>†</sup> | 1               | 0.87(0.35-2.17) | ————            |
| <b>Coronary heart disease, n</b>       | 190             | 7               | 4               |
| Age and sex-adjusted HR (95% CI)       | 1               | 0.88(0.41-1.89) | 1.14(0.42-3.08) |
| Multivariable HR (95% CI)*             | 1               | 0.84(0.39-1.83) | 1.28(0.47-3.51) |
| Multivariable HR (95% CI) <sup>†</sup> | 1               | 0.86(0.39-1.86) | 1.21(0.44-3.34) |
| <b>Total cardiovascular disease, n</b> | 780             | 26              | 12              |
| Age and sex-adjusted HR (95% CI)       | 1               | 0.92(0.62-1.37) | 0.94(0.53-1.66) |
| Multivariable HR (95% CI)*             | 1               | 0.92(0.61-1.36) | 0.96(0.54-1.72) |
| Multivariable HR (95% CI) <sup>†</sup> | 1               | 0.90(0.60-1.34) | 0.93(0.52-1.66) |
| <b>BMI &lt;25 kg/m<sup>2</sup>, n</b>  | 50247           | 2853            | 1334            |
| Person-years                           | 815097          | 46911           | 22284           |
| <b>Total stroke, n</b>                 | 1392            | 48              | 19              |
| Age and sex-adjusted HR (95% CI)       | 1               | 1.26(0.94-1.68) | 1.03(0.65-1.62) |
| Multivariable HR (95% CI)*             | 1               | 1.20(0.90-1.61) | 0.98(0.62-1.55) |
| Multivariable HR (95% CI) <sup>†</sup> | 1               | 1.21(0.90-1.62) | 0.96(0.61-1.52) |
| <b>Cerebral infarction, n</b>          | 778             | 14              | 6               |
| Age and sex-adjusted HR (95% CI)       | 1               | 0.79(0.47-1.35) | 0.67(0.30-1.50) |
| Multivariable HR (95% CI)*             | 1               | 0.76(0.44-1.29) | 0.63(0.28-1.42) |
| Multivariable HR (95% CI) <sup>†</sup> | 1               | 0.77(0.45-1.31) | 0.60(0.27-1.35) |
| <b>Hemorrhagic stroke, n</b>           | 565             | 32              | 13              |
| Age and sex-adjusted HR (95% CI)       | 1               | 1.65(1.15-2.37) | 1.41(0.81-2.46) |
| Multivariable HR (95% CI)*             | 1               | 1.54(1.07-2.22) | 1.35(0.78-2.36) |

|                                        |             |                 |                 |
|----------------------------------------|-------------|-----------------|-----------------|
| Multivariable HR (95% CI) <sup>†</sup> | 1           | 1.55(1.07-2.23) | 1.34(0.77-2.34) |
| <b>Coronary heart disease, n</b>       | <b>626</b>  | <b>24</b>       | <b>9</b>        |
| Age and sex-adjusted HR (95% CI)       | 1           | 1.42(0.94-2.13) | 1.09(0.56-2.10) |
| Multivariable HR (95% CI)*             | 1           | 1.25(0.83-1.90) | 1.00(0.52-1.94) |
| Multivariable HR (95% CI) <sup>†</sup> | 1           | 1.21(0.80-1.84) | 0.98(0.51-1.91) |
| <b>Total cardiovascular disease, n</b> | <b>3195</b> | <b>109</b>      | <b>43</b>       |
| Age and sex-adjusted HR (95% CI)       | 1           | 1.28(1.05-1.55) | 1.04(0.77-1.40) |
| Multivariable HR (95% CI)*             | 1           | 1.20(0.99-1.46) | 0.98(0.73-1.33) |
| Multivariable HR (95% CI) <sup>†</sup> | 1           | 1.20(0.99-1.45) | 0.96(0.71-1.30) |

\* Adjusted further for histories of hypertension and diabetes, smoking status, alcohol intake, hours of walking, hours of sports, hours of sleeping, educational status, perceived mental stress, and marital status.

<sup>†</sup> Adjusted further for food and nutrients: skipping breakfast, total energy intake, food intakes of fish, fruits, vegetables, and nutrients intakes of sodium and saturated fatty acids.

Supplementary Table S3 BMI stratified hazard ratios (HRs) and 95% confidence intervals (CIs) for cardiovascular mortality outcomes according to supper time.

| Supper time, pm                        | 0<BMI<18.5 kg/m <sup>2</sup> |                 |                 | 18.5 kg/m <sup>2</sup> ≤BMI< 23kg/m <sup>2</sup> |                 |                 | 23 kg/m <sup>2</sup> ≤BMI<25 kg/m <sup>2</sup> |                 |                 | BMI ≥25 kg/m <sup>2</sup> |                 |                 |
|----------------------------------------|------------------------------|-----------------|-----------------|--------------------------------------------------|-----------------|-----------------|------------------------------------------------|-----------------|-----------------|---------------------------|-----------------|-----------------|
|                                        | Always<br>≤8                 | Irregular       | Always >8       | Always<br>≤8                                     | Irregular       | Always >8       | Always<br>≤8                                   | Irregular       | Always >8       | Always<br>≤8              | Irregular       | Always >8       |
| <b>Number of subjects, n</b>           | 3893                         | 185             | 80              | 31711                                            | 1794            | 844             | 14643                                          | 874             | 410             | 12228                     | 840             | 336             |
| Person-years                           | 55683                        | 2761            | 1194            | 515919                                           | 29710           | 14011           | 243495                                         | 14441           | 7080            | 203325                    | 13836           | 5773            |
| <b>Total stroke, n</b>                 | 206                          | 6               | 4               | 855                                              | 24              | 12              | 331                                            | 18              | 3               | 324                       | 9               | 2               |
| Age and sex-adjusted HR (95% CI)       | 1                            | 1.11(0.49-2.51) | 1.73(0.64-4.66) | 1                                                | 0.99(0.66-1.49) | 1.07(0.61-1.90) | 1                                              | 2.07(1.28-3.35) | 0.60(0.19-1.88) | 1                         | 0.78(0.40-1.52) | 0.38(0.10-1.54) |
| Multivariable HR (95% CI)*             | 1                            | 1.00(0.44-2.29) | 1.73(0.63-4.71) | 1                                                | 0.95(0.63-1.43) | 1.01(0.57-1.79) | 1                                              | 2.10(1.29-3.43) | 0.61(0.19-1.91) | 1                         | 0.77(0.39-1.52) | 0.39(0.10-1.57) |
| Multivariable HR (95% CI) <sup>†</sup> | 1                            | 1.07(0.46-2.48) | 1.70(0.61-4.73) | 1                                                | 0.95(0.63-1.44) | 0.96(0.54-1.70) | 1                                              | 2.15(1.31-3.53) | 0.68(0.22-2.13) | 1                         | 0.77(0.39-1.51) | 0.37(0.09-1.48) |
| <b>Cerebral infarction, n</b>          | 107                          | 2               | 1               | 491                                              | 6               | 4               | 180                                            | 6               | 1               | 178                       | 4               | 2               |
| Age and sex-adjusted HR (95% CI)       | 1                            | ————            | ————            | 1                                                | 0.50(0.23-1.13) | 0.71(0.27-1.91) | 1                                              | 1.77(0.78-4.01) | ————            | 1                         | ————            | ————            |
| Multivariable HR (95% CI)*             | 1                            | ————            | ————            | 1                                                | 0.48(0.21-1.08) | 0.66(0.25-1.78) | 1                                              | 1.92(0.84-4.41) | ————            | 1                         | ————            | ————            |
| Multivariable HR (95% CI) <sup>†</sup> | 1                            | ————            | ————            | 1                                                | 0.48(0.21-1.09) | 0.58(0.21-1.56) | 1                                              | 2.01(0.87-4.67) | ————            | 1                         | ————            | ————            |
| <b>Hemorrhagic stroke, n</b>           | 88                           | 3               | 3               | 337                                              | 17              | 8               | 140                                            | 12              | 2               | 134                       | 5               | 0               |
| Age and sex-adjusted HR (95% CI)       | 1                            | ————            | ————            | 1                                                | 1.43(0.87-2.34) | 1.46(0.72-2.96) | 1                                              | 2.38(1.30-4.34) | 0.76(0.19-3.10) | 1                         | 0.84(0.34-2.06) | ————            |
| Multivariable HR (95% CI)*             | 1                            | ————            | ————            | 1                                                | 1.34(0.81-2.20) | 1.36(0.67-2.77) | 1                                              | 2.31(1.25-4.27) | 0.81(0.20-3.30) | 1                         | 0.85(0.34-2.12) | ————            |
| Multivariable HR (95% CI) <sup>†</sup> | 1                            | ————            | ————            | 1                                                | 1.35(0.81-2.22) | 1.36(0.67-2.77) | 1                                              | 2.37(1.27-4.41) | 0.85(0.21-3.48) | 1                         | 0.87(0.35-2.17) | ————            |
| <b>Coronary heart disease, n</b>       | 67                           | 2               | 1               | 409                                              | 14              | 5               | 150                                            | 8               | 3               | 190                       | 7               | 4               |
| Age and sex-adjusted HR (95% CI)       | 1                            | ————            | ————            | 1                                                | 1.23(0.72-2.10) | 0.96(0.40-2.31) | 1                                              | 2.03(0.98-4.17) | 1.29(0.41-4.06) | 1                         | 0.88(0.41-1.89) | 1.14(0.42-3.08) |
| Multivariable HR (95% CI)*             | 1                            | ————            | ————            | 1                                                | 1.09(0.63-1.87) | 0.86(0.35-2.08) | 1                                              | 1.73(0.83-3.61) | 1.24(0.39-3.95) | 1                         | 0.84(0.39-1.83) | 1.28(0.47-3.51) |
| Multivariable HR (95% CI) <sup>†</sup> | 1                            | ————            | ————            | 1                                                | 1.04(0.60-1.79) | 0.82(0.34-2.00) | 1                                              | 1.63(0.77-3.45) | 1.22(0.38-3.93) | 1                         | 0.86(0.39-1.86) | 1.21(0.44-3.34) |
| <b>Total cardiovascular disease, n</b> | 439                          | 17              | 8               | 2007                                             | 57              | 25              | 749                                            | 35              | 10              | 780                       | 26              | 12              |
| Age and sex-adjusted HR (95% CI)       | 1                            | 1.56(0.96-2.55) | 1.63(0.81-3.28) | 1                                                | 1.03(0.79-1.34) | 0.99(0.66-1.47) | 1                                              | 1.78(1.26-2.50) | 0.89(0.48-1.67) | 1                         | 0.92(0.62-1.37) | 0.94(0.53-1.66) |
| Multivariable HR (95% CI)*             | 1                            | 1.54(0.94-2.54) | 1.71(0.84-3.48) | 1                                                | 0.97(0.75-1.27) | 0.92(0.62-1.36) | 1                                              | 1.72(1.21-2.43) | 0.86(0.46-1.62) | 1                         | 0.92(0.61-1.36) | 0.96(0.54-1.72) |
| Multivariable HR (95% CI) <sup>†</sup> | 1                            | 1.54(0.93-2.56) | 1.59(0.77-3.26) | 1                                                | 0.97(0.74-1.27) | 0.89(0.06-1.32) | 1                                              | 1.71(1.20-2.43) | 0.89(0.47-1.67) | 1                         | 0.90(0.60-1.34) | 0.93(0.52-1.66) |

\* Adjusted further for histories of hypertension and diabetes, smoking status, alcohol intake, hours of walking, hours of sports, hours of sleeping, educational status, perceived mental stress, and marital status.

---

† Adjusted further for food and nutrients: skipping breakfast, total energy intake, food intakes of fish, fruits, vegetables, and nutrients intakes of sodium and saturated fatty acids.
